# Supplementary material
Source: Springer Nature journal article supplement (https://www.springermedizin.de/resource/supplementary/12885_2013_4153_MOESM11_ESM.pdf/9465582)

A

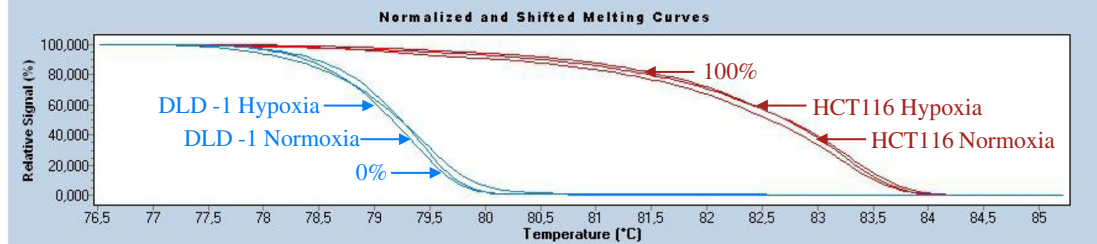

PHD3.1

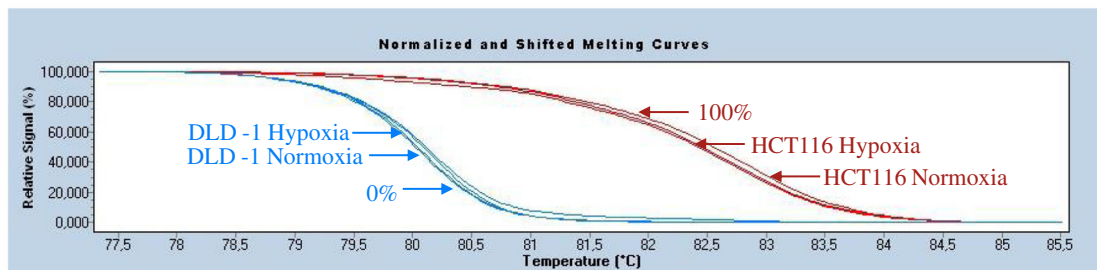

PHD3.2

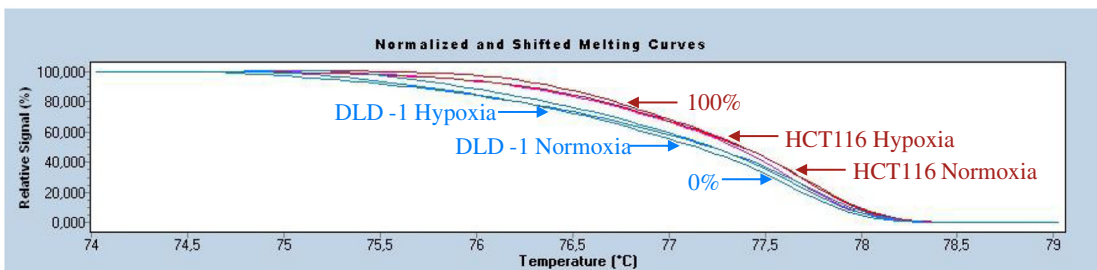

PHD3.3

B

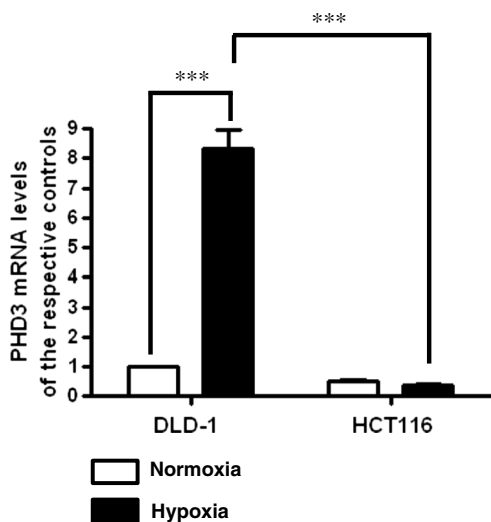

C

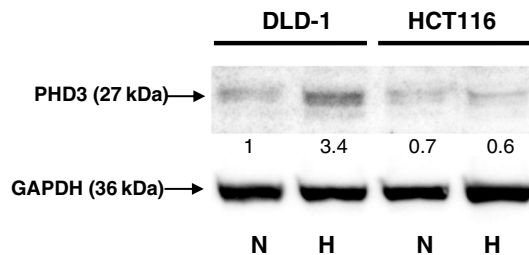

Supplement: MOESM11 [file 9465582]
